# Supplementary material for: Location based spectrum sensing evaluation in cognitive radio networks
Source: Springer Nature journal article supplement (doi:10.1186/1687-1499-2011-74), 2011-08-24

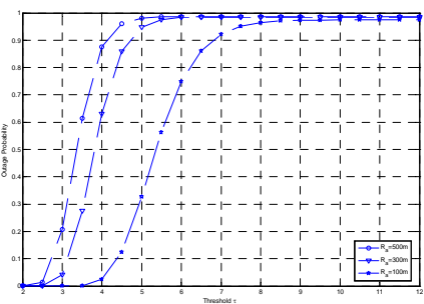

Supplement: 13638_2011_90_MOESM3_ESM.pdf [file 13638_2011_90_MOESM3_ESM.pdf]
